# Supplementary material for: Acquisition of Freezing Tolerance of Resurrection Species from Gesneriaceae, a Comparative Study
Source: MDPI journal article supplement (doi:10.3390/plants12091893), 2023-05-05
Supplement: s1 [file s1]

Supplementary Materials

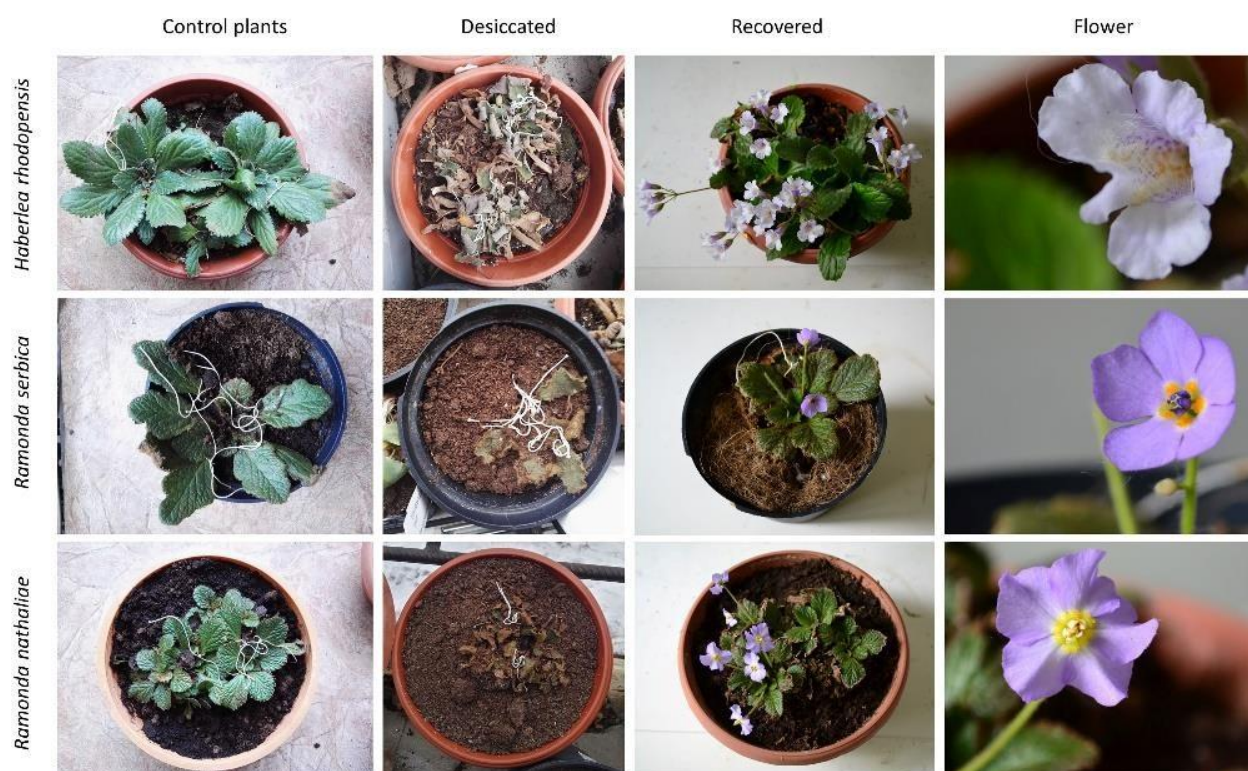

**Figure S1.** Control, desiccated by freezing temperatures, recovered plants as well as close-up view of *H. rhodopensis*, *R. serbica* and *R. nathaliae* flowers.

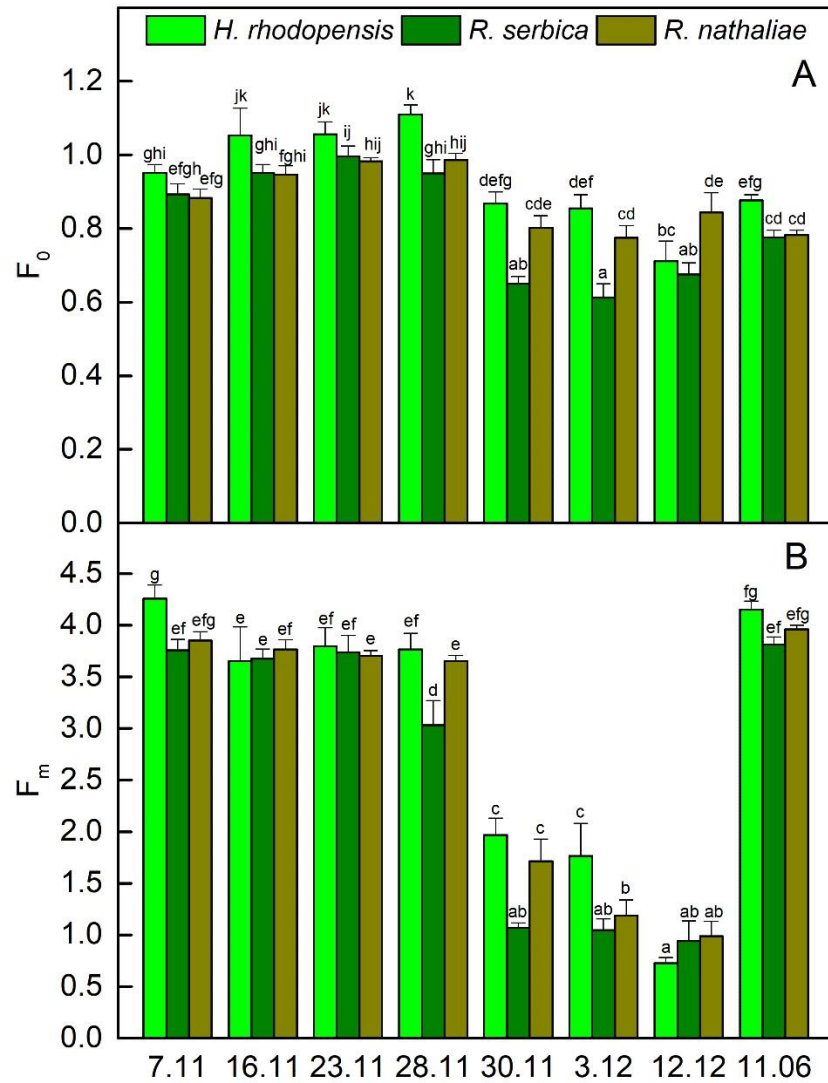

**Figure S2.** Minimum ( $F_0$ ; A) and maximum ( $F_m$ ; B) fluorescence levels of *H. rhodopensis*, *R. serbica* and *R. nathaliae* leaves during cold acclimation (7–28 November), freezing stress (30 November), freezing-induced desiccation (3 December–07 February) as well after recovery of plants (11 June) in ex situ environmental conditions. Values are given as mean  $\pm$  SE. Data represent the mean of  $n = 6$ . Changes between plants were statistically compared. The same letters within a graph indicate no significant differences assessed by the Fisher LSD test ( $p \leq 0.05$ ) after performing ANOVA.

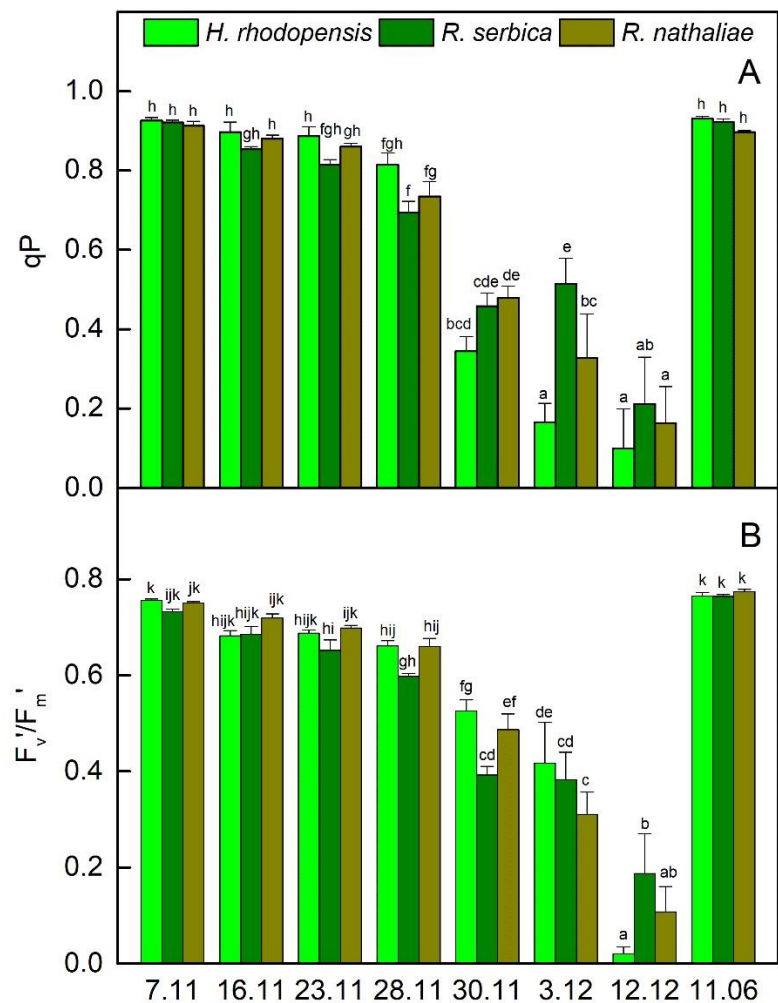

**Figure S3.** Changes of the open PSII centers,  $qP$  (A) and thermal energy dissipation,  $1 - F_v'/F_m'$  (B) of *H. rhodopensis*, *R. serbica* and *R. nathaliae* leaves during cold acclimation (7–28 November), freezing stress (30 November), freezing-induced desiccation (3 December–07 February) as well after recovery of plants (11 June) in ex situ environmental conditions. Values are given as mean  $\pm$  SE. Data represent the mean of  $n = 6$ . Changes between plants were statistically compared. The same letters within a graph indicate no significant differences assessed by the Fisher LSD test ( $p \leq 0.05$ ) after performing ANOVA.
